# Supplementary material
Source: Elsevier journal article supplement (https://www.sciencedirect.com/science/article/pii/S0211699518300687)
Supplement: mmc1 [file S0211699518300687:mmc1.docx]

| **Causas de no sugerencias o rechazo de sugerencia en las dos fases de intervención de MCA** | |
| --- | --- |
| Tabla 1. Causas de ausencia de sugerencia en la fase de intervención 1 | |
| Número de mediciones de Hb | Razón para la no sugerencia |
| 23 (9.62%) | Número insuficiente de días en la clínica |
| 5 (2.09%) | Ferritina antigua o procesada previamente |
| 27 (11.30%) | Administración de ESA o de hierro diferente al elegido |
| 1 (0.42%) | Hb antigua |
| 63 (26.36%) | Admisión reciente |
| 16 (6.69%) | Transfusión |
| 93 (38.91%) | No sugerencia previa en días [20-40] antes de la medición de Hb |
| 11 (4.60%) | Sugerencia obsoleta |
| Total: 239 mediciones de Hb | |
| Tabla 2. Causas de rechazo en la fase de intervención 1 | |
| Número de sugerencias | Causas de rechazo de sugerencia |
| 10 (5.56%) | De acuerdo en reducir la dosis pero debe hacerse gradualmente |
| 1 (0.56%) | De acuerdo en aumentar la dosis pero debe hacerse gradualmente |
| 2 (1.11%) | El estado actual del paciente es originado por un evento |
| 8 (4.44%) | El objetivo de Hb debe ser mayor en este paciente |
| 3 (1.67%) | Sugerencia de hierro no confirmada, por lo que la dosis de Darbepoetina debe ser ajustada por consiguiente |
| 2 (1.11%) | Sugerencia de hierro no confirmada, por lo que la dosis de ESA debe ser ajustada por consiguiente |
| 133 (73.89%) | Otros |
| 1 (0.56%) | Condiciones del paciente |
| 20 (11.11%) | Condiciones estables, no modificar dosis |
| Total: 180 sugerencias |  |
| Tabla 3. Causas de ausencia de sugerencia en la fase de intervención 2 | |
| Número de mediciones de Hb | Razón para la no sugerencia |
| 38 (17.76%) | Número insuficiente de días en la clínica |
| 7 (3.27%) | Administración de ESA o de hierro diferente al elegido |
| 34 (15.89%) | Admisión reciente |
| 18 (8.41%) | Transfusión |
| 109 (50.93%) | No sugerencia previa en días [20-40] antes de la medición de Hb |
| 8 (3.74%) | Sugerencia obsoleta |
| Total: 214 mediciones de Hb | |
| Tabla 4. Causas de rechazo de sugerencia en la fase de intervención 2 | |
| Número de sugerencias | Causas de rechazo de sugerencia |
| 1 (12.50%) | De acuerdo en reducir la dosis pero debe hacerse gradualmente |
| 3 (37.50%) | El estado actual del paciente es originado por un evento |
| 1 (12.50%) | El objetivo de Hb debe ser mayor en este paciente |
| 1 (12.50%) | Sugerencia de hierro no confirmada, por lo que la dosis de ESA debe ser ajustada por consiguiente |
| 2 (25%) | Condiciones del paciente |
| Total: 8 sugerencias | |
